# Supplementary material
Source: PubMed Central journal article supplement (PMC6155488)

# Supplementary Figures

## Supplementary Figure Legends

**Supplementary Figure 1. A, B.** Bar charts showing effect of siATR SMARTpool and individual ATR siRNAs on cell survival in two SS cell lines. Error bars represent standard deviation from triplicate experiments. *p* value calculated by Student's *t* test. **C.** Western blot illustrating ATR silencing 48 hours after transfection with siRNAs targeting *ATR*. Effects of SMARTpool and the four different constituent siRNAs are shown. **D.** Dose-response curves showing resistance of non-tumour cell lines (C2C12, MCF10A and HFF1) to VX970 in five-day survival assays. Error bars represent SD from triplicate experiments. **E.** Scatter dot plots showing SF<sub>50</sub> values for SS tumour cell lines screened for sensitivity to VX970 in five-day survival assays compared to non-SS tumour cells ("other"), ATM defective, ARID1A defective or Ewing's sarcoma (EWS) tumour cell lines. *p*-values represent Mann-Whitney test. Error bars represent standard deviation. **F-H.** Dose-response curves showing sensitivity of SS tumour cell lines to AZD6738, AZ20 and VE821 ATR inhibitors in five-day survival assays. HCT116 cells were used as a negative control for resistance to ATR inhibitors. *p*-values represent 2-way ANOVA compared to HCT116 cells. Error bars represent SD from triplicate experiments.

**Supplementary Figure 2. A.** Bar chart illustrating effect of SS18-SSX fusions on viability of HCT116 cells over six days. Error bars represent standard deviation from triplicate experiments. **B.** Bar chart illustrating effect of SS18-SSX on viability of HFF1 cells over six days. Error bars represent standard deviation. *p*-values calculated using Student's *t*-test. **C.** Western blot illustrating SS18-SSX expression and effect on SMARCB1 in HFF1 cells. **D.** Western blot illustrating SS18-SSX expression and effect on SMARCB1 in U2OS cells. **E.** Dose-response curves illustrating effect of SS18-SSX expression on sensitivity of U2OS cells to VX970. *p*-values calculated by 2-way ANOVA. Error bars represent SD from triplicate experiments. **F-G.** Gene silencing of *SMARCB1* causes ATR inhibitor sensitivity in HCT116 cells. HCT116 cells were reverse transfected with *ARID1A*, *SMARCB1* or non-targeting control siRNA. Twenty-four hours after transfection, cells were exposed to VX970 for five continuous days at which point cell viability was estimated by CellTiterGlo reagent. **F.** Dose response curves from three independent experiments. Error bars represent standard error of the mean. **G.** Western blots of lysates isolated from cells 24 hours after reverse transfection with siRNA.

**Supplementary Figure 3. A.** Western blots illustrating phosphorylation of CHK1 following exposure to 2 mM hydroxyurea (HU) for 4 hours. **B.** Western blots illustrating phosphorylation of CHK1 and H2AX following exposure to 5  $\mu$ M cisplatin for 24 hours. **C.** Western blot illustrating phosphorylation of ATM and CHK2 4 hours after exposure to 5 Gy ionising radiation (IR). **D.** Bar chart illustrating percentage of SYO-1 cells with >5 nuclear foci RAD51 foci in the presence of 500 nM VX970, 2 mM hydroxyurea (HU), or 4 hours after exposure to 10 Gy IR. 100 cells were counted and scored for >5 foci. All *p*-values were calculated using student's *t*-tests. **E.** Western blots illustrating successful fractionation of the chromatin enriched fraction from HCT116 cells. Tubulin was used as a cytoplasmic control and histone H3 as a chromatin-bound control. G = GIPZ transfected cells, E = empty vector transfected cells, SS1 = SS18-SSX1 cDNA transfected cells, SS2 = SS18-SSX2 cDNA transfected cells. **F.** Western blot illustrating effect of SS18-SSX expression on TOP2A levels in the chromatin fraction of HCT116 cells. **G.** Scatter dot plots showing SF<sub>50</sub> values for cell lines screened for BMN673 (talazoparib) sensitivity in five-day cell survival assays. *p*-values calculated using Mann-Whitney test. Error bars represent standard deviation. BRCA = Breast Cancer; EWS = Ewing's sarcoma. **H.** Dose-response curves showing sensitivity of SS tumour cell lines to BMN673 (talazoparib) in five-day survival assays. SUM149 (BRCA1 mutant) and SUM149 R2.5 (BRCA1 revertant mutation) breast cancer cell lines were included as PARP inhibitor-sensitive and PARP inhibitor-resistant controls, respectively. Error bars represent standard error of the mean (SEM) from triplicate experiments. **I-J.** Dose-response curves illustrating effect of SS18-SSX1, SS18-SSX2 and D71-78 fusion expression on sensitivity of HCT116 cells to talazoparib (BMN673) (I) or olaparib (J). Error bars represent standard error of the mean (SEM) from triplicate experiments SYO-1 SS tumour cell line was included as a PARP inhibitor-sensitive SS cell line.

**Supplementary Figure 4. A.** Fork rates measured in DNA fibres prepared from SYO-1 cells exposed to DMSO for 2 hours, then IdU (30 mins) followed by CldU (30 mins). Example image is shown in lower panel. **B.** Fork rates measured in DNA fibres prepared from SYO-1 cells exposed to 500 nM VX970 for 2 hours, then IdU (30 mins) followed by CldU (30 mins). Example image is shown in lower panel. **C.** Fork rates measured in DNA fibres prepared from HCT116 cells expressing SS18-SSX1 or empty constructs exposed to DMSO or 500 nM VX970 for 2 hours, then IdU (30 mins) followed by CldU (30 mins). At least 100 tracks were measured for each condition. **D.** Quantification of number of SYO-1 cells in S-phase presented in Figure 3J. **E.** Western blot illustrating that ectopic expression of SS18-SSX expression does not alter levels of Cyclin E protein expression. **4F,G.** Cell cycle profiles of SYO-1 SS tumour cells transfected with siAllstar (control, F) or siCCNE1 (G) for 72h. DAPI was used to estimate DNA content and EdU incorporation was used to estimate the S phase fraction. Numbers indicate fraction of cells present in each cell cycle phase.

**Supplementary Figure 5. A.** MacSynergy plots for SYO-1 and HS-SY-II cells exposed to escalating concentrations of VX970 combined with doxorubicin. 3D synergy plots represent synergy volumes in mM<sup>2</sup>; volumes > 120 mM<sup>2</sup> were considered as synergistic (details in Methods). **B.** MacSynergy plots for SYO-1 and HS-SY-II cells exposed to escalating concentrations of VX970 combined with 4-HC (pre-activated cyclophosphamide). **C.** MacSynergy plots for SYO-1 and HS-SY-II cells exposed to escalating doses of VX970 combined with the multi-kinase PDGFR/VEGFR-inhibitor Pazopanib. **D.** Dose-response curves for SYO-1 and HS-SY-II cells exposed to escalating doses of VX970 combined with doxorubicin. Error bars represent standard deviation. \*\**p* < 0.01; \*\*\*\**p* < 0.0001. **E.** Dose-response curves for SYO-1 and HS-SY-II cells exposed to escalating doses of VX970 combined with the pre-activated derivative of cyclophosphamide, 4-HC. Error bars represent standard deviation. \*\**p* < 0.01; \*\*\**p* < 0.001. **F.** Dose-response curves for SYO-1 and HS-SY-II cells treated with escalating doses of VX970 (0 – 1 mM) combined with the multi-kinase PDGFR/VEGFR-inhibitor Pazopanib (0 – 10 mM). Error bars represent standard deviation.

# Supplementary Figure 1.

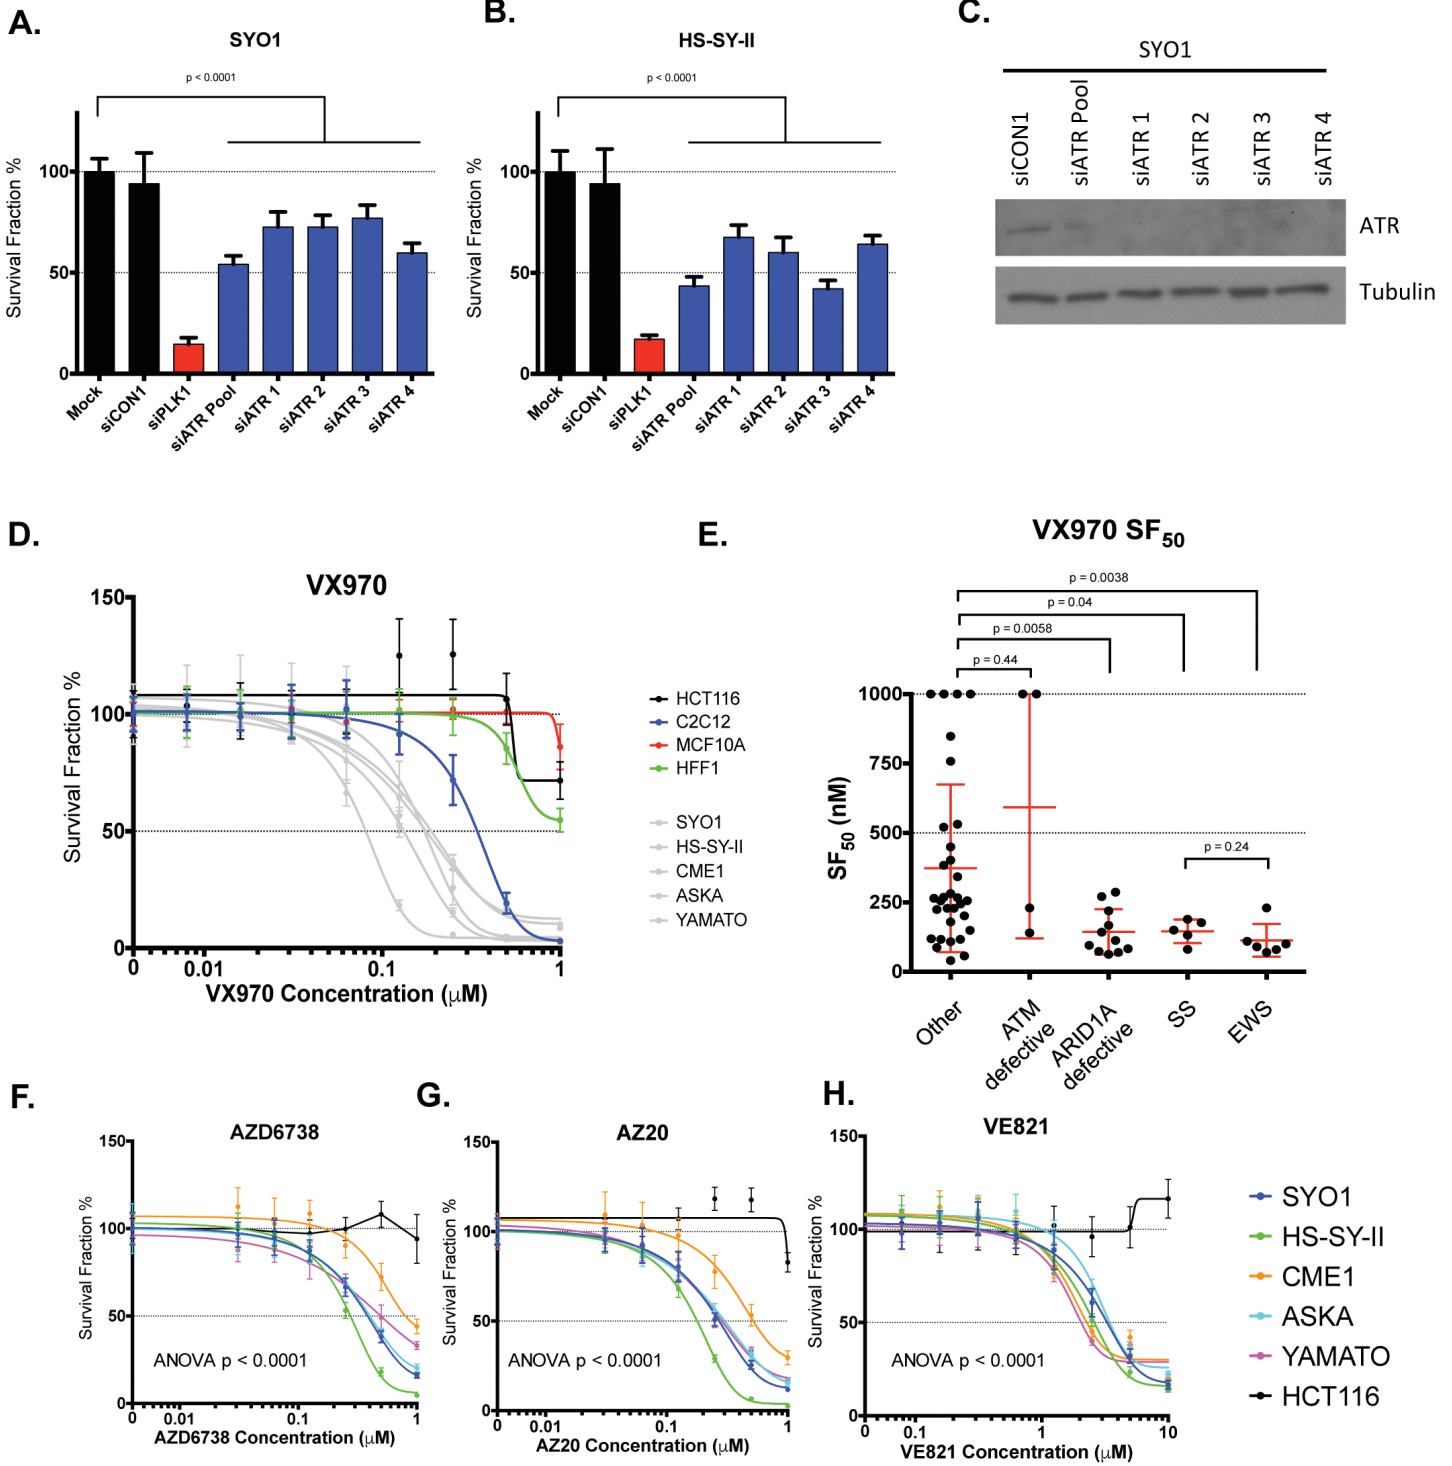

## Supplementary Figure 2.

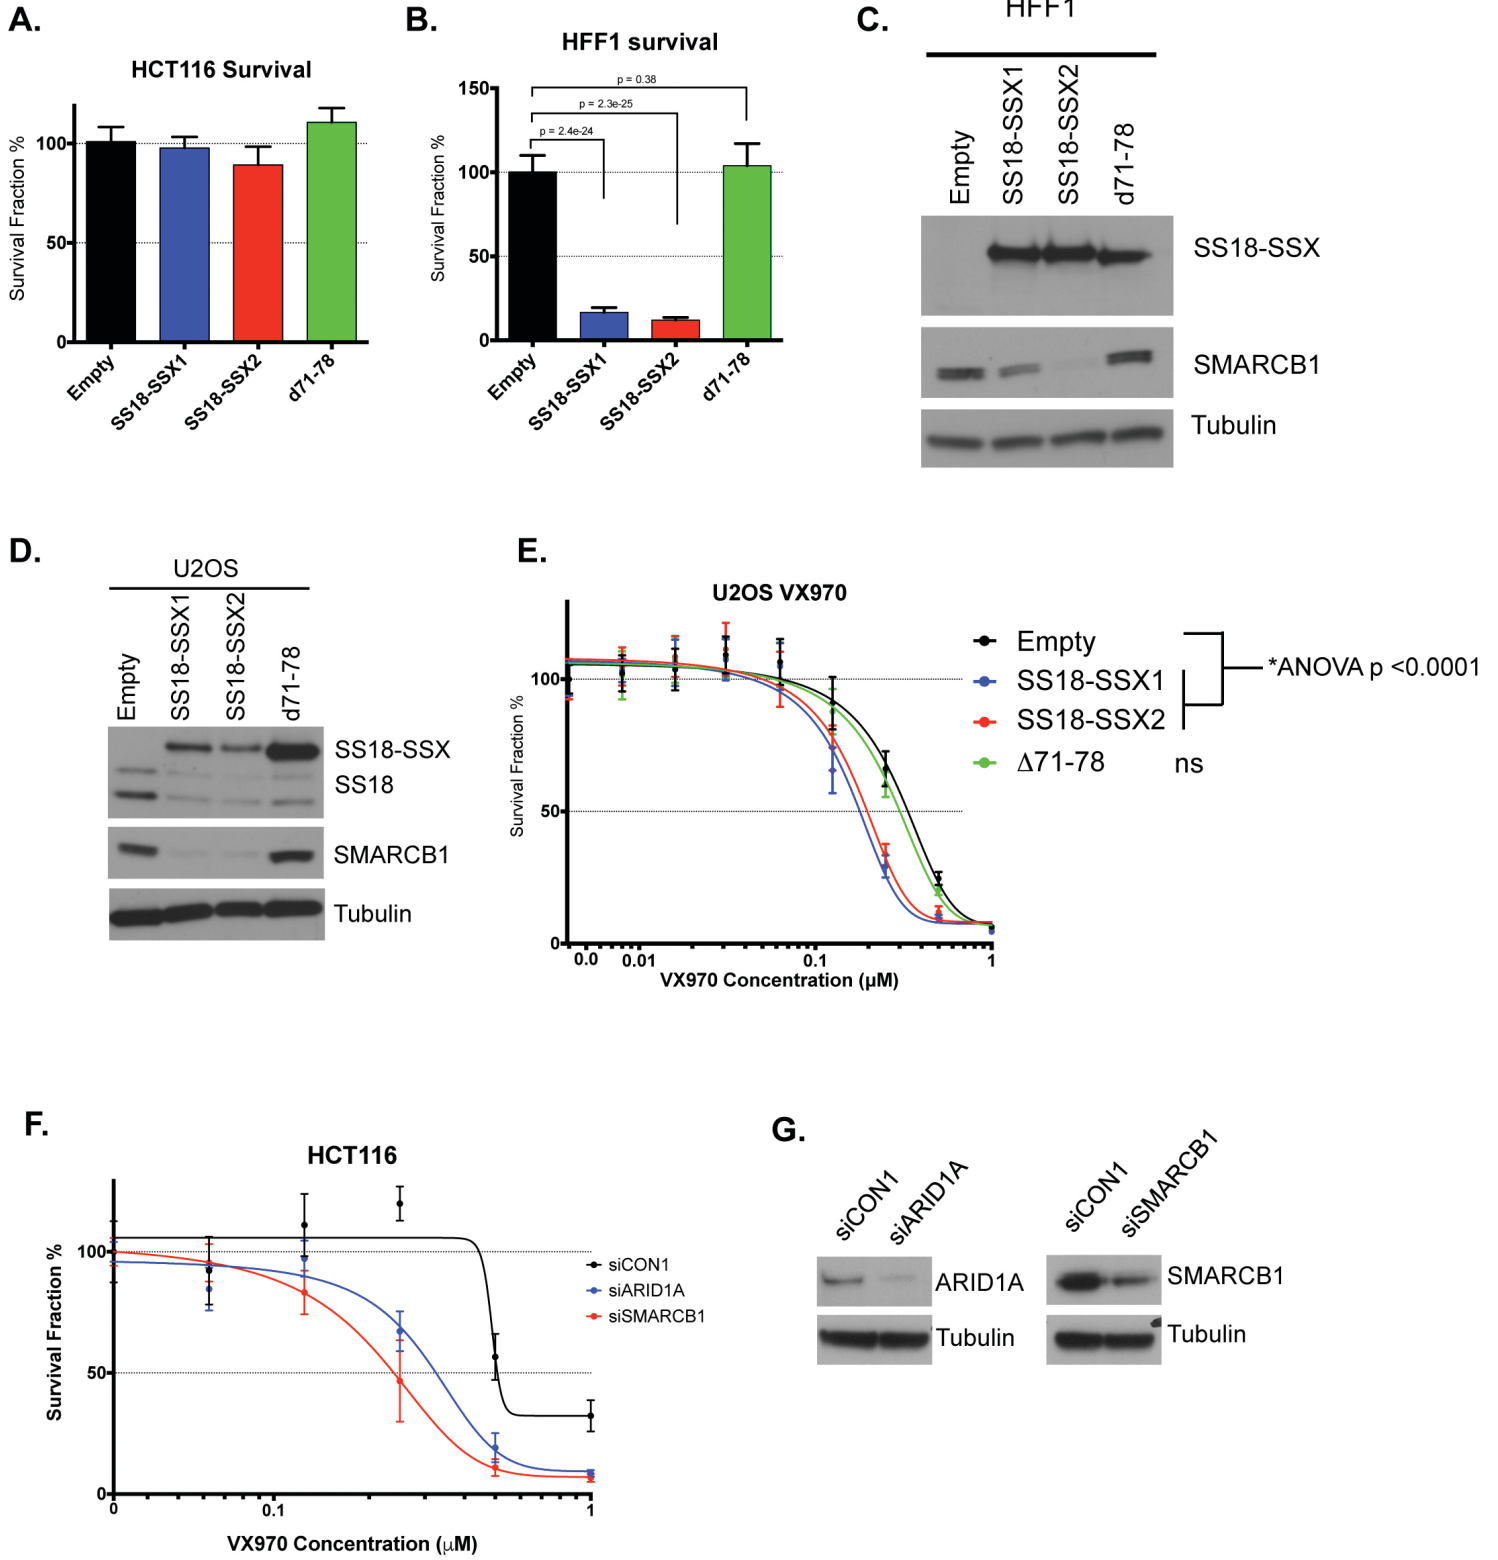

# Supplementary Figure 3.

**A.**

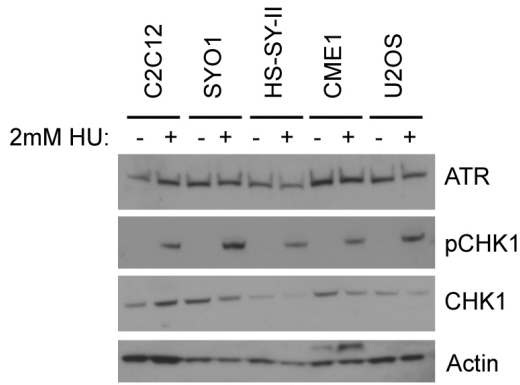

**B.**

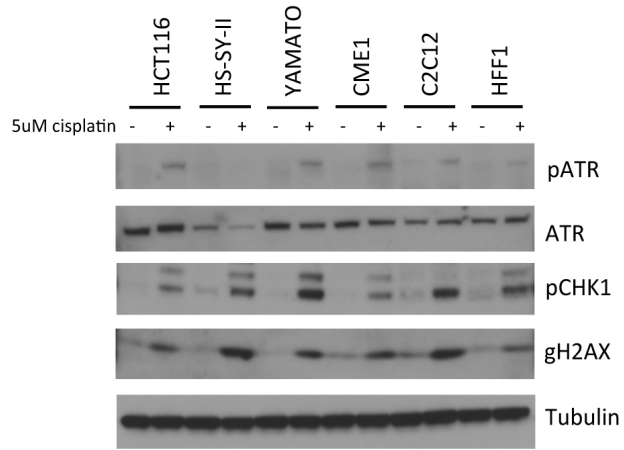

**C.**

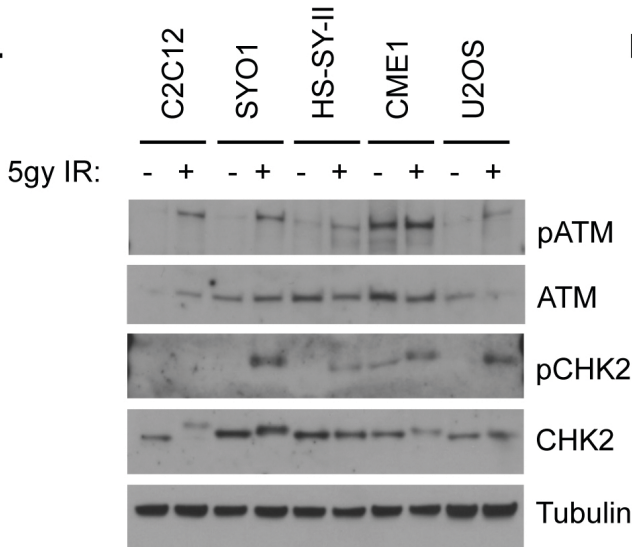

**D.**

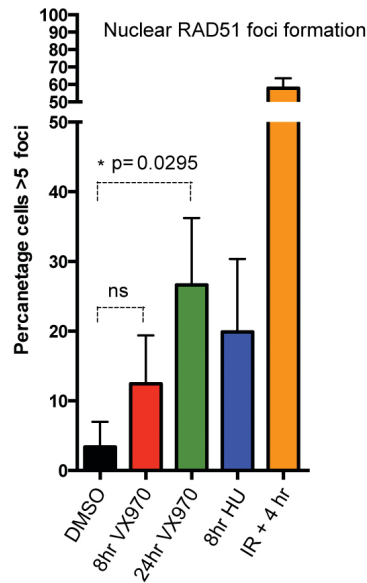

**E.**

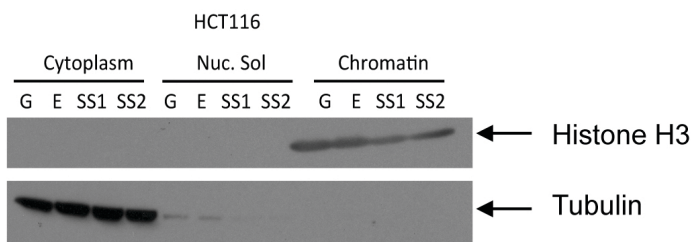

**F.**

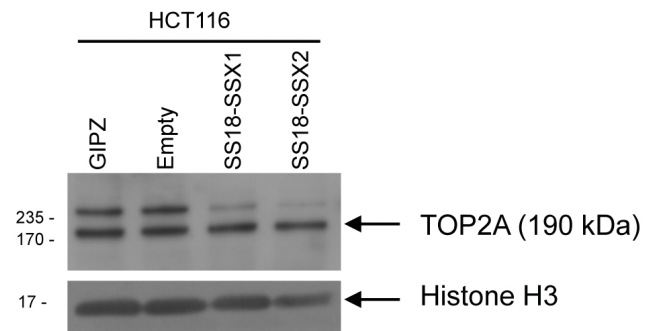

**G.**

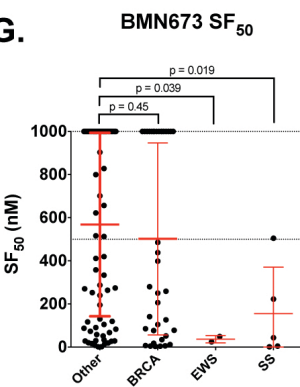

**H.**

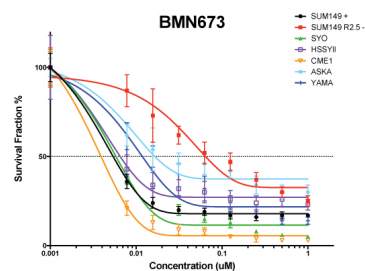

**I.**

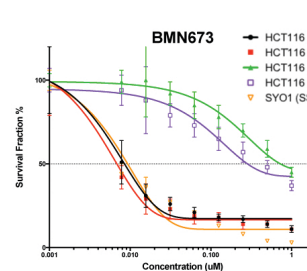

**J.**

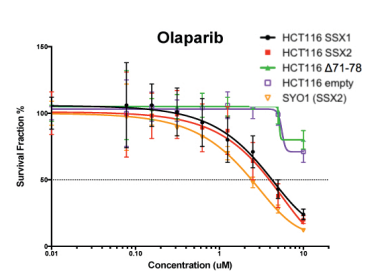

**Supplementary Figure 4.**

**A.**

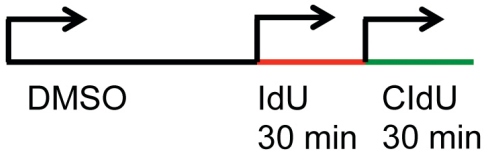

**B.**

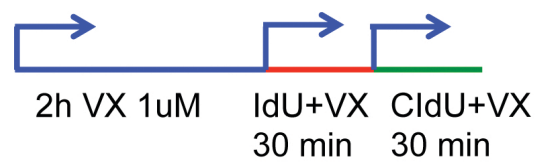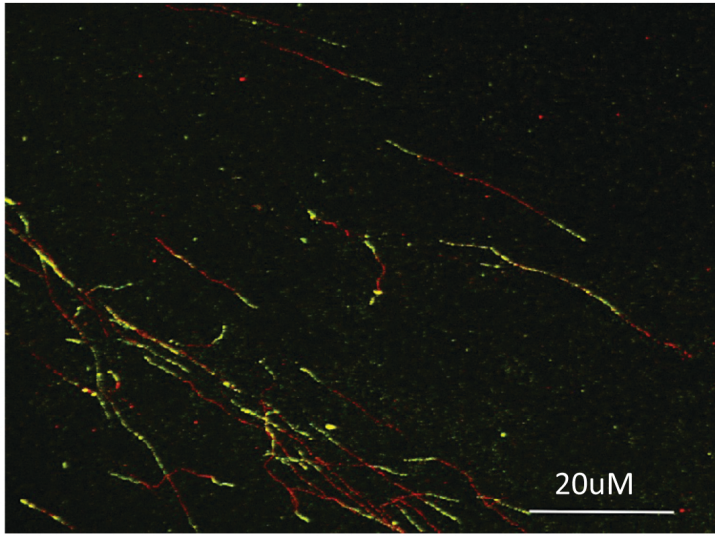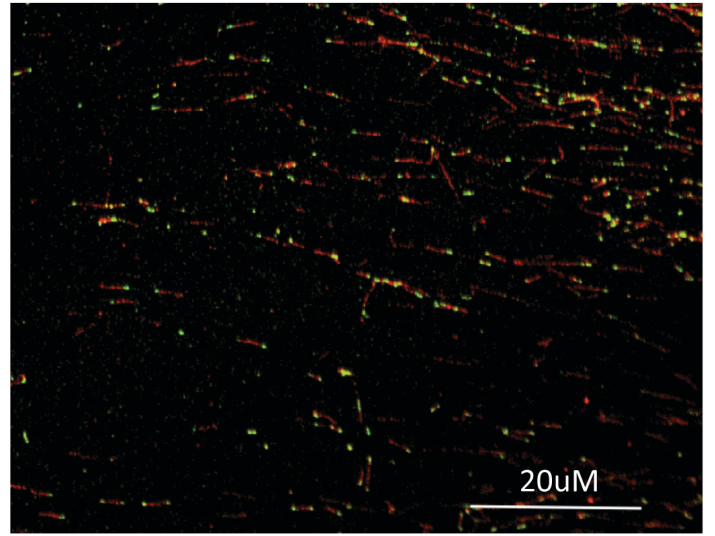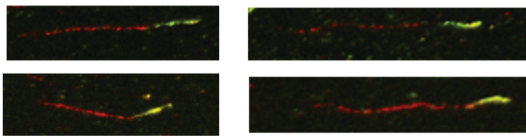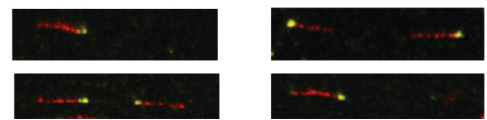

**C.**

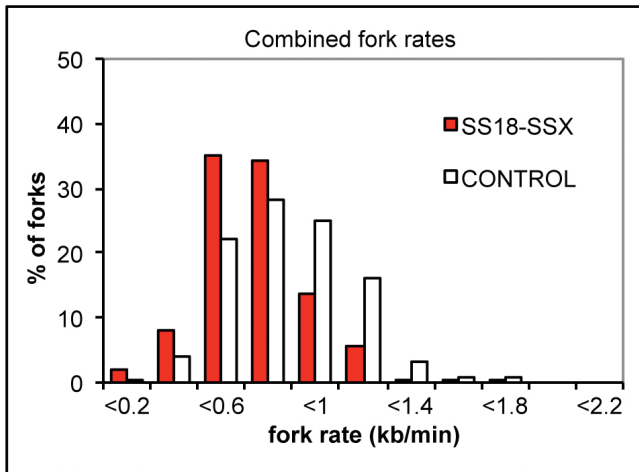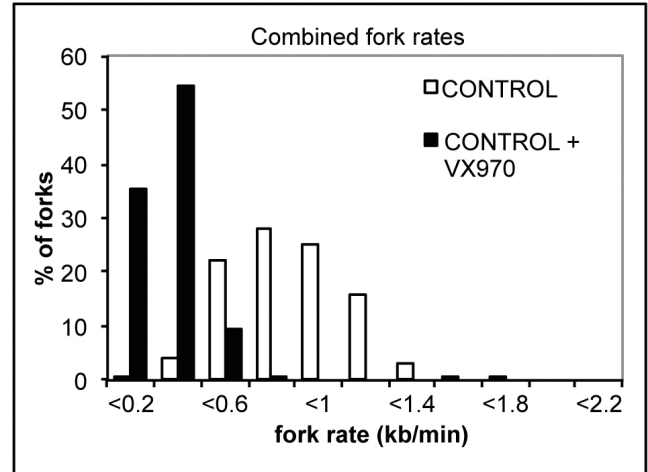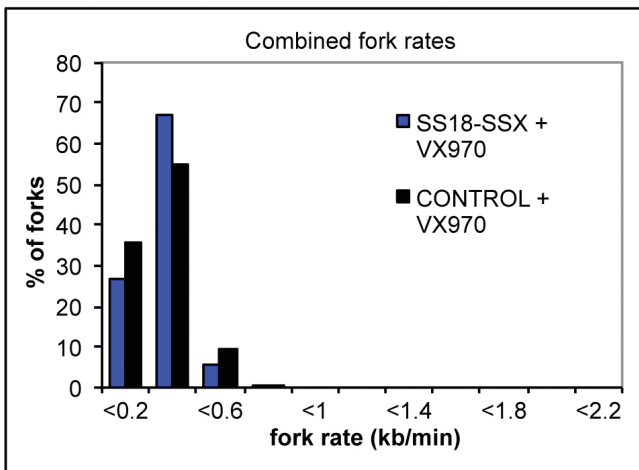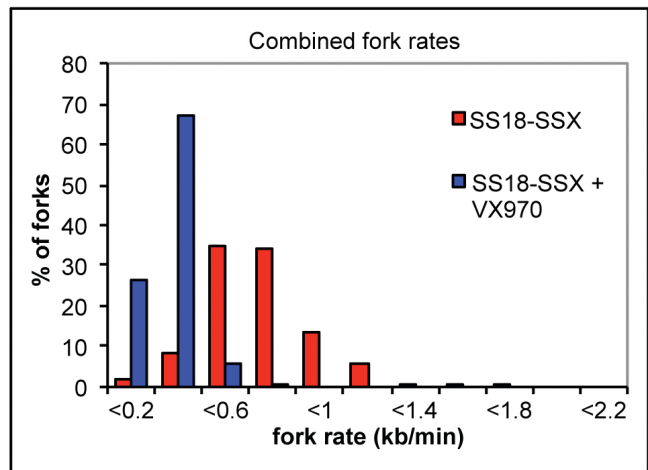

**Supplementary Figure 4.**  
Continued

**D.**

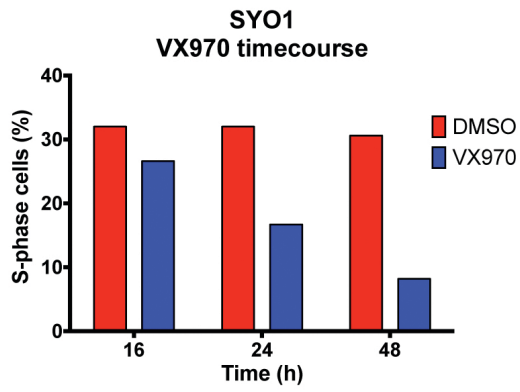

**E.**

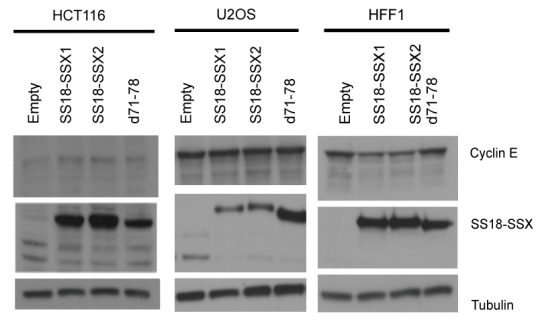

**F.**

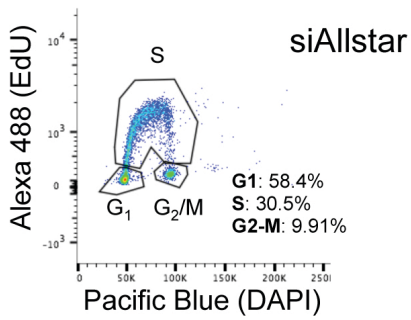

**G.**

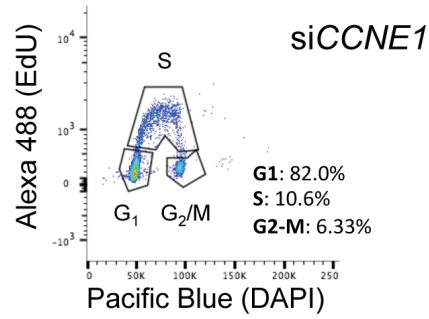

# Supplementary Figure 5

## A. VX970 + Doxorubicin

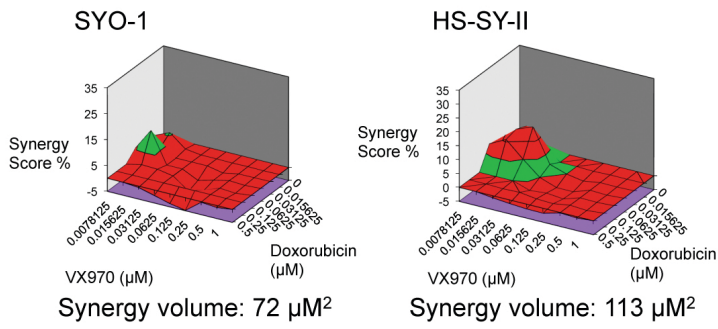

## B. VX970 + 4HC

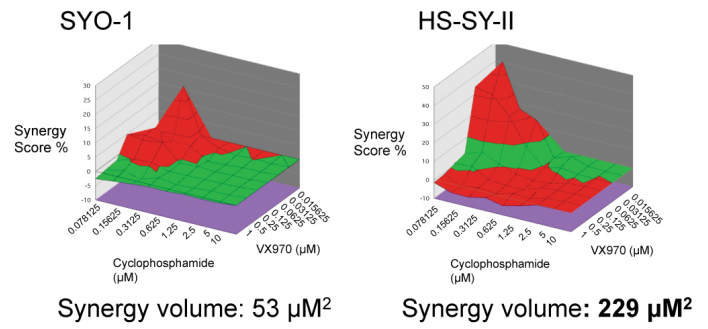

## C. VX970 + Pazopanib

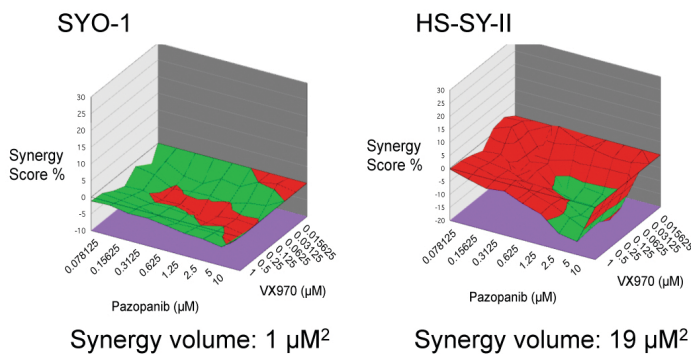

## D. VX970 + Doxorubicin

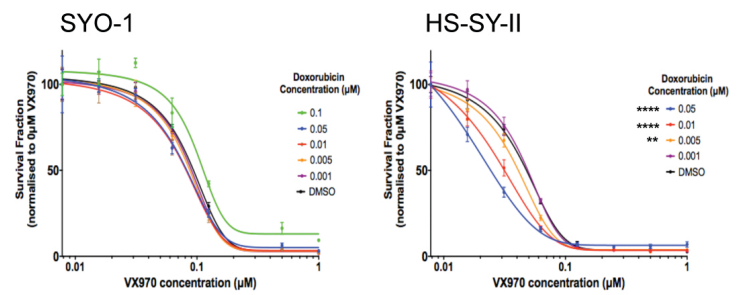

## E. VX970 + 4HC

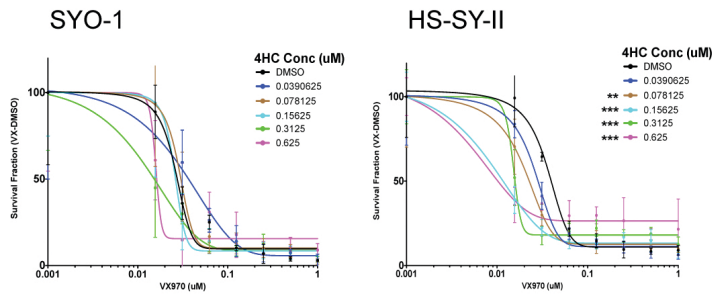

## F. VX970 + Pazopanib

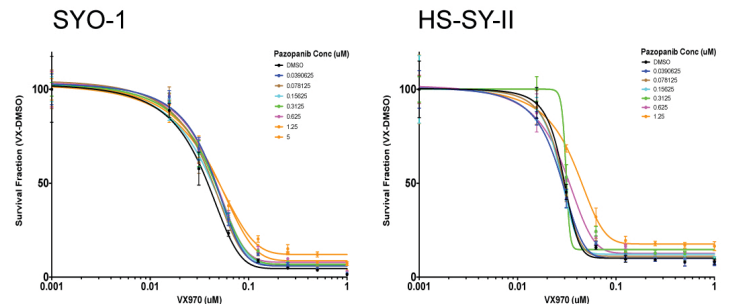

Supplement: NIHMS79528-supplement-Supplementary_figures.pdf [file NIHMS79528-supplement-Supplementary_figures.pdf]
